# Supplementary material for: Antipsychotics and Risks of Cardiovascular and Cerebrovascular Diseases and Mortality in Dwelling Community Older Adults
Source: MDPI journal article supplement (doi:10.3390/ph17020178), 2024-01-30
Supplement: s1 [file s1]

## Supplemental files

**Table S1** Demographic and clinical characteristics of the initial sub-cohort without schizophrenia/dementia and after IPTW according to the adherence level.

|                                                              | Initial sub-cohort  |                    |                                  | Sub-cohort after IPTW |                    |                                  |
|--------------------------------------------------------------|---------------------|--------------------|----------------------------------|-----------------------|--------------------|----------------------------------|
|                                                              | Adherence level     |                    | Absolute standardized difference | Adherence level       |                    | Absolute standardized difference |
|                                                              | < 60%<br>(n=18,002) | ≥ 60%<br>(n=9,398) |                                  | < 60%<br>(n=18,002)   | ≥ 60%<br>(n=9,398) |                                  |
| Age at group entry, mean years (SD)*                         | 77.6 (6.5)          | 80.7 (7.2)         | 0.47                             | 78.8 (7.0)            | 79.0 (6.8)         | 0.03                             |
| Male, %                                                      | 44.0                | 39.0               | 0.10                             | 42.2                  | 42.5               | 0.01                             |
| <b>Prevalence within 3-year prior cohort entry, %</b>        |                     |                    |                                  |                       |                    |                                  |
| Hypertension                                                 | 68.9                | 69.6               | 0.01                             | 69.3                  | 69.9               | 0.01                             |
| Diabetes mellitus                                            | 26.8                | 27.1               | 0.01                             | 27.1                  | 27.9               | 0.02                             |
| Dyslipidemia                                                 | 32.9                | 28.4               | 0.10                             | 31.3                  | 31.6               | 0.01                             |
| Stroke                                                       | 11.0                | 14.0               | 0.09                             | 12.3                  | 13.0               | 0.02                             |
| Coronary artery disease excluding MI                         | 43.3                | 45.1               | 0.04                             | 44.3                  | 45.7               | 0.03                             |
| Myocardial infarction                                        | 7.8                 | 8.7                | 0.03                             | 8.2                   | 8.7                | 0.02                             |
| Heart failure                                                | 16.3                | 20.5               | 0.11                             | 18.2                  | 19.3               | 0.03                             |
| Atrial fibrillation                                          | 15.6                | 18.5               | 0.08                             | 16.9                  | 18.0               | 0.03                             |
| Major bleeding                                               | 12.8                | 11.7               | 0.03                             | 12.4                  | 12.8               | 0.01                             |
| Systemic embolism                                            | 1.7                 | 1.5                | 0.01                             | 1.7                   | 2.0                | 0.02                             |
| CKD with eGRF < 30 mL/min <sup>†</sup>                       | 2.9                 | 3.2                | 0.01                             | 3.1                   | 4.4                | 0.07                             |
| Acute renal failure                                          | 8.4                 | 9.6                | 0.04                             | 9.1                   | 10.0               | 0.03                             |
| Liver disease                                                | 2.8                 | 2.7                | 0.01                             | 2.7                   | 2.8                | <0.01                            |
| COPD <sup>‡</sup>                                            | 38.9                | 39.5               | 0.01                             | 39.3                  | 40.1               | 0.02                             |
| Neurologic disease                                           | 16.7                | 21.8               | 0.13                             | 18.8                  | 19.7               | 0.02                             |
| Hypothyroidism                                               | 18.3                | 19.3               | 0.03                             | 18.9                  | 19.3               | 0.01                             |
| Malign cancer                                                | 59.9                | 34.9               | 0.52                             | 50.7                  | 48.7               | 0.04                             |
| Dementia                                                     | 0.0                 | 0.0                | -                                | 0.0                   | 0.0                | -                                |
| <b>Medical procedures in 3-year prior to cohort entry, %</b> |                     |                    |                                  |                       |                    |                                  |
| Percutaneous coronary intervention /CABG                     | 3.7                 | 2.9                | 0.04                             | 3.4                   | 3.5                | 0.01                             |
| Medical procedures for a defibrillator                       | 1.7                 | 2.0                | 0.02                             | 1.9                   | 2.0                | 0.01                             |
| <b>Medication in 1-year prior to cohort entry</b>            |                     |                    |                                  |                       |                    |                                  |
| Diuretics                                                    | 34.9                | 39.2               | 0.09                             | 36.7                  | 37.9               | 0.03                             |
| Inhibitors of renin-angiotensin system                       | 40.4                | 42.7               | 0.05                             | 41.4                  | 41.8               | 0.01                             |
| Beta-blockers                                                | 32.4                | 34.2               | 0.04                             | 33.2                  | 34.0               | 0.02                             |
| Spironolactone or eplerenone                                 | 3.0                 | 3.3                | 0.02                             | 3.2                   | 3.2                | <0.01                            |
| Digoxin                                                      | 5.0                 | 7.0                | 0.09                             | 5.8                   | 6.0                | 0.01                             |
| Hydralazine                                                  | 0.4                 | 0.6                | 0.02                             | 0.5                   | 0.5                | <0.01                            |
| Nitrates                                                     | 17.5                | 20.9               | 0.08                             | 18.9                  | 19.5               | 0.01                             |

|                                             |             |            |       |             |             |       |
|---------------------------------------------|-------------|------------|-------|-------------|-------------|-------|
| Statins                                     | 43.1        | 40.4       | 0.01  | 42.1        | 42.5        | 0.01  |
| Antiarrhythmic (amiodarone or propafenone)  | 2.5         | 2.6        | 0.01  | 2.5         | 2.5         | <0.01 |
| Warfarin                                    | 11.6        | 12.9       | 0.04  | 12.2        | 12.8        | 0.02  |
| DOAC                                        | 0.2         | 0.1        | <0.01 | 0.2         | 0.1         | <0.01 |
| Antiplatelets (without ASA) <sup>‡</sup>    | 6.5         | 8.1        | 0.06  | 7.1         | 7.4         | 0.01  |
| Low-dose ASA                                | 42.8        | 46.3       | 0.07  | 44.2        | 45.3        | 0.02  |
| <b>Antidiabetics</b>                        |             |            |       |             |             |       |
| Metformin                                   | 13.3        | 13.5       | 0.01  | 13.5        | 13.5        | <0.01 |
| Sulfonylurea                                | 9.0         | 9.1        | <0.01 | 9.1         | 9.4         | 0.01  |
| Thiazolidinediones                          | 1.8         | 1.9        | <0.01 | 1.8         | 1.9         | 0.01  |
| DPP-4 inhibitors <sup>£</sup>               | 0.2         | 0.2        | <0.01 | 0.2         | 0.3         | 0.01  |
| SGLT2 inhibitors <sup>£</sup>               | 0.0         | 0.0        | -     | 0.0         | 0.0         | -     |
| Insulins                                    | 3.6         | 4.1        | 0.03  | 3.9         | 4.2         | 0.02  |
| <b>Other medications</b>                    |             |            |       |             |             |       |
| Proton pump inhibitors                      | 43.7        | 42.0       | 0.03  | 43.4        | 44.4        | 0.02  |
| Antidepressant agents                       | 27.8        | 40.6       | 0.27  | 32.9        | 34.4        | 0.03  |
| Anticholinergics agents                     | 4.8         | 4.7        | <0.01 | 4.8         | 4.8         | <0.01 |
| Benzodiazepine                              | 51.5        | 59.3       | 0.16  | 54.6        | 56.2        | 0.03  |
| Polypharmacy (≥ 10 medications)             | 57.7        | 59.5       | 0.04  | 58.9        | 60.6        | 0.04  |
| <b>Health care services in 1-year prior</b> |             |            |       |             |             |       |
| Number of visit medicals, mean (SD)         | 12.4 (11.5) | 9.2 (10.6) | 0.29  | 11.3 (10.6) | 12.6 (19.7) | 0.08  |
| Emergency visit, mean (SD)                  | 1.9 (2.6)   | 2.0 (2.8)  | 0.05  | 2.0 (2.7)   | 2.0 (2.7)   | 0.02  |
| Hospitalization (%)                         | 60.0        | 49.7       | 0.21  | 56.5        | 56.1        | 0.01  |

\*: Mean ±SD (Standard Deviation)

†: CKD: Chronic renal failure with estimated Glomerular rate filtration < 30 mL/min.

‡: COPD: Chronic obstructive pulmonary disease

¥: ASA: Acid acetylic salicylic acid

£: DPP-4 inhibitors: Dipeptidyl peptidase; SGLT2 inhibitors: Sodium-glucose co-transporter 2 inhibitors.

MI: Myocardial infarction.

**Table S2.** Demographic and clinical characteristics of the initial sub-cohort of schizophrenia and after IPTW according to the adherence level.

|                                                              | Initial sub-cohort |                  |                                  | Sub-cohort after IPTW |                  |                                  |
|--------------------------------------------------------------|--------------------|------------------|----------------------------------|-----------------------|------------------|----------------------------------|
|                                                              | Adherence level    |                  | Absolute standardized difference | Adherence level       |                  | Absolute standardized difference |
|                                                              | < 60%<br>(n=278)   | ≥ 60%<br>(n=513) |                                  | < 60%<br>(n=278)      | ≥ 60%<br>(n=513) |                                  |
| Age at group entry, mean years (SD)*                         | 77.3 (6.6)         | 78.4 (7.0)       | 0.17                             | 78.0 (6.7)            | 78.0 (7.0)       | <0.01                            |
| Male, %                                                      | 33.5               | 30.4             | 0.07                             | 30.7                  | 31.6             | 0.02                             |
| <b>Prevalence within 3-year prior cohort entry, %</b>        |                    |                  |                                  |                       |                  |                                  |
| Hypertension                                                 | 61.9               | 63.4             | 0.03                             | 62.5                  | 63.0             | 0.01                             |
| Diabetes mellitus                                            | 18.7               | 21.3             | 0.06                             | 18.4                  | 19.8             | 0.04                             |
| Dyslipidemia                                                 | 22.7               | 24.4             | 0.04                             | 22.7                  | 24.0             | 0.03                             |
| Stroke                                                       | 11.9               | 13.5             | 0.05                             | 14.0                  | 13.2             | 0.02                             |
| Coronary artery disease excluding MI                         | 35.6               | 34.5             | 0.02                             | 34.2                  | 34.8             | 0.01                             |
| Myocardial infarction                                        | 6.5                | 5.3              | 0.05                             | 5.3                   | 5.5              | 0.01                             |
| Heart failure                                                | 13.0               | 14.4             | 0.04                             | 14.4                  | 13.7             | 0.02                             |
| Atrial fibrillation                                          | 13.3               | 13.1             | 0.01                             | 13.4                  | 13.2             | 0.01                             |
| Major bleeding                                               | 12.2               | 9.6              | 0.09                             | 11.0                  | 10.8             | 0.01                             |
| Systemic embolism                                            | 0.4                | 1.2              | 0.09                             | 0.8                   | 0.9              | 0.01                             |
| CKD with eGFR < 30 mL/min <sup>†</sup>                       | 2.2                | 2.5              | 0.02                             | 2.3                   | 2.4              | 0.01                             |
| Acute renal failure                                          | 6.8                | 6.0              | 0.03                             | 6.0                   | 6.1              | <0.01                            |
| Liver disease                                                | 1.8                | 2.1              | 0.02                             | 2.0                   | 1.9              | 0.01                             |
| COPD <sup>‡</sup>                                            | 36.7               | 28.9             | 0.17                             | 31.8                  | 31.7             | <0.01                            |
| Neurologic disease                                           | 24.1               | 21.1             | 0.07                             | 22.3                  | 22.5             | <0.01                            |
| Hypothyroidism                                               | 19.4               | 23.2             | 0.09                             | 20.9                  | 21.9             | 0.03                             |
| Malign cancer                                                | 22.3               | 20.7             | 0.04                             | 21.2                  | 21.2             | <0.01                            |
| Dementia                                                     | 34.5               | 40.9             | 0.13                             | 38.2                  | 38.5             | 0.01                             |
| <b>Medical procedures in 3-year prior to cohort entry, %</b> |                    |                  |                                  |                       |                  |                                  |
| Percutaneous coronary intervention /CABG                     | 2.2                | 1.6              | 0.04                             | 1.5                   | 1.6              | 0.01                             |
| Medical procedures for a defibrillator                       | 0.7                | 1.4              | 0.06                             | 1.4                   | 1.2              | 0.02                             |
| <b>Medications in 1-year prior to cohort entry</b>           |                    |                  |                                  |                       |                  |                                  |
| Diuretics                                                    | 27.0               | 27.1             | <0.01                            | 28.3                  | 27.0             | 0.03                             |
| Inhibitors of renin-angiotensin system                       | 28.1               | 32.0             | 0.08                             | 30.2                  | 30.5             | 0.01                             |
| Beta-blockers                                                | 21.9               | 27.5             | 0.13                             | 24.4                  | 25.4             | 0.02                             |
| Spironolactone or eplerenone                                 | 1.8                | 1.0              | 0.07                             | 1.1                   | 1.1              | <0.01                            |
| Digoxin                                                      | 3.2                | 3.1              | 0.01                             | 3.3                   | 3.1              | 0.01                             |
| Hydralazine                                                  | 0.4                | 0.2              | 0.03                             | 0.2                   | 0.2              | <0.01                            |
| Nitrates                                                     | 12.2               | 12.3             | <0.01                            | 11.7                  | 12.1             | 0.01                             |
| Statins                                                      | 22.3               | 29.6             | 0.17                             | 24.8                  | 26.9             | 0.05                             |

|                                             |           |            |      |           |            |       |
|---------------------------------------------|-----------|------------|------|-----------|------------|-------|
| Antiarrhythmic (amiodarone or propafenone)  | 2.2       | 1.4        | 0.06 | 1.5       | 1.6        | <0.01 |
| Warfarin                                    | 8.3       | 7.6        | 0.02 | 8.4       | 7.9        | 0.02  |
| DOAC                                        | 0.0       | 0.2        | 0.06 | 0.0       | 0.1        | 0.05  |
| Antiplatelets (without ASA) <sup>¥</sup>    | 5.8       | 4.1        | 0.08 | 4.4       | 4.6        | 0.01  |
| Low-dose ASA                                | 32.4      | 37.8       | 0.11 | 34.0      | 35.3       | 0.03  |
| <b>Antidiabetics</b>                        |           |            |      |           |            |       |
| Metformin                                   | 6.8       | 10.3       | 0.13 | 8.0       | 8.9        | 0.03  |
| Sulfonylurea                                | 5.4       | 7.4        | 0.08 | 6.3       | 6.6        | 0.01  |
| Thiazolidinediones                          | 1.1       | 1.6        | 0.04 | 1.4       | 1.4        | <0.01 |
| DPP-4 inhibitors <sup>£</sup>               | 0.0       | 0.4        | 0.09 | 0.0       | 0.3        | 0.07  |
| SGLT2 inhibitors <sup>£</sup>               | 0.0       | 0.0        | -    | 0.0       | 0.0        | -     |
| Insulins                                    | 2.2       | 2.7        | 0.04 | 2.2       | 2.5        | 0.02  |
| <b>Other medications</b>                    |           |            |      |           |            |       |
| Proton pump inhibitors                      | 28.1      | 26.3       | 0.04 | 27.0      | 26.7       | 0.01  |
| Antidepressant agents                       | 36.7      | 38.6       | 0.04 | 38.6      | 38.4       | <0.01 |
| Anticholinergics agents                     | 4.0       | 3.3        | 0.03 | 3.3       | 3.4        | <0.01 |
| Benzodiazepine                              | 48.9      | 51.5       | 0.05 | 50.0      | 50.3       | 0.01  |
| Polypharmacy (≥ 10 medications)             | 40.3      | 39.6       | 0.01 | 38.6      | 39.4       | 0.02  |
| <b>Health care services in 1-year prior</b> |           |            |      |           |            |       |
| Number of visit medicals, mean (SD)         | 9.2 (9.5) | 8.3 (11.9) | 0.08 | 8.6 (8.5) | 8.7 (13.0) | 0.01  |
| Emergency visit, mean (SD)                  | 2.7 (3.3) | 2.8 (7.7)  | 0.03 | 2.7 (3.3) | 2.8 (7.0)  | 0.01  |
| Hospitalization (%)                         | 59.4      | 57.1       | 0.05 | 57.3      | 57.8       | 0.01  |

\*: Mean ±SD (Standard Deviation)

†: CKD: Chronic renal failure with estimated Glomerular rate filtration < 30 mL/min.

‡: COPD: Chronic obstructive pulmonary disease

¥: ASA: Acid acetylic salicylic acid

£: DPP-4 inhibitors: Dipeptidyl peptidase; SGLT2 inhibitors: Sodium-glucose co-transporter 2 inhibitors.

**Table S3.** Demographic and clinical characteristics of the initial sub-cohort of dementia and after IPTW according to the adherence level.

|                                                              | Initial sub-cohort |                    |                                  | Sub-cohort after IPTW |                    |                                  |
|--------------------------------------------------------------|--------------------|--------------------|----------------------------------|-----------------------|--------------------|----------------------------------|
|                                                              | Adherence level    |                    | Absolute standardized difference | Adherence level       |                    | Absolute standardized difference |
|                                                              | < 60%<br>(n=5,035) | ≥ 60%<br>(n=9,730) |                                  | < 60%<br>(n=5,035)    | ≥ 60%<br>(n=9,730) |                                  |
| Age at group entry, mean years (SD)*                         | 82.8 (6.5)         | 82.7 (6.3)         | 0.01                             | 82.8 (6.5)            | 82.7 (6.3)         | <0.01                            |
| Male, %                                                      | 38.0               | 34.7               | 0.07                             | 36.1                  | 35.9               | <0.01                            |
| <b>Prevalence within 3-year prior cohort entry, %</b>        |                    |                    |                                  |                       |                    |                                  |
| Hypertension                                                 | 73.3               | 72.9               | 0.01                             | 72.8                  | 73.0               | <0.01                            |
| Diabetes mellitus                                            | 26.8               | 26.2               | 0.01                             | 26.5                  | 26.5               | <0.01                            |
| Dyslipidemia                                                 | 29.7               | 27.5               | 0.05                             | 28.0                  | 28.2               | <0.01                            |
| Stroke                                                       | 19.9               | 18.2               | 0.04                             | 18.8                  | 18.8               | <0.01                            |
| Coronary artery disease excluding MI                         | 48.4               | 45.3               | 0.06                             | 46.4                  | 46.4               | <0.01                            |
| Myocardial infarction                                        | 10.4               | 8.5                | 0.06                             | 9.3                   | 9.2                | <0.01                            |
| Heart failure                                                | 22.7               | 22.1               | 0.06                             | 21.1                  | 21.0               | <0.01                            |
| Atrial fibrillation                                          | 22.1               | 19.2               | 0.07                             | 20.3                  | 20.2               | <0.01                            |
| Major bleeding                                               | 13.7               | 12.3               | 0.04                             | 12.7                  | 12.8               | <0.01                            |
| Systemic embolism                                            | 1.7                | 1.1                | 0.04                             | 1.3                   | 1.3                | <0.01                            |
| CKD with eGRF < 30 mL/min <sup>†</sup>                       | 3.3                | 2.5                | 0.05                             | 2.8                   | 2.8                | <0.01                            |
| Acute renal failure                                          | 13.1               | 10.9               | 0.07                             | 11.7                  | 11.7               | <0.01                            |
| Liver disease                                                | 3.0                | 2.4                | 0.04                             | 2.6                   | 2.6                | <0.01                            |
| COPD <sup>‡</sup>                                            | 37.6               | 34.6               | 0.06                             | 35.7                  | 35.7               | <0.01                            |
| Neurologic disease                                           | 36.0               | 31.5               | 0.09                             | 33.1                  | 33.1               | <0.01                            |
| Hypothyroidism                                               | 22.0               | 22.5               | 0.01                             | 22.4                  | 22.4               | <0.01                            |
| Malign cancer                                                | 29.3               | 23.2               | 0.14                             | 25.3                  | 25.3               | <0.01                            |
| <b>Medical procedures in 3-year prior to cohort entry, %</b> |                    |                    |                                  |                       |                    |                                  |
| Percutaneous coronary intervention /CABG                     | 2.1                | 1.5                | 0.05                             | 1.7                   | 1.7                | <0.01                            |
| Medical procedures for a defibrillator                       | 2.2                | 2.4                | 0.01                             | 2.3                   | 2.3                | <0.01                            |
| <b>Medications in 1-year prior to cohort entry</b>           |                    |                    |                                  |                       |                    |                                  |
| Diuretics                                                    | 38.3               | 36.0               | 0.04                             | 36.8                  | 36.8               | <0.01                            |
| Inhibitors of renin-angiotensin system                       | 40.8               | 41.4               | 0.01                             | 41.2                  | 41.2               | <0.01                            |
| Beta-blockers                                                | 31.3               | 31.3               | <0.01                            | 31.4                  | 31.3               | <0.01                            |
| Spironolactone or eplerenone                                 | 3.2                | 2.6                | 0.04                             | 2.8                   | 2.8                | <0.01                            |
| Digoxin                                                      | 7.4                | 7.1                | 0.01                             | 7.2                   | 7.2                | <0.01                            |
| Hydralazine                                                  | 0.6                | 0.4                | 0.03                             | 0.5                   | 0.5                | <0.01                            |
| Nitrates                                                     | 19.2               | 17.2               | 0.05                             | 17.9                  | 17.9               | <0.01                            |
| Statins                                                      | 35.2               | 36.8               | 0.03                             | 36.0                  | 36.2               | <0.01                            |
| Antiarrhythmic (amiodarone or propafenone)                   | 2.4                | 2.0                | 0.03                             | 2.1                   | 2.1                | <0.01                            |

|                                             |           |           |       |           |            |       |
|---------------------------------------------|-----------|-----------|-------|-----------|------------|-------|
| Warfarin                                    | 13.6      | 12.1      | 0.05  | 12.7      | 12.6       | <0.01 |
| DOAC                                        | 0.1       | 0.1       | 0.03  | 0.1       | 0.1        | <0.01 |
| Antiplatelets (without ASA) <sup>¥</sup>    | 9.6       | 8.3       | 0.05  | 8.9       | 8.8        | <0.01 |
| Low-dose ASA                                | 48.4      | 48.2      | <0.01 | 48.1      | 48.3       | <0.01 |
| <b>Antidiabetics</b>                        |           |           |       |           |            |       |
| Metformin                                   | 12.3      | 12.3      | <0.01 | 12.2      | 12.3       | <0.01 |
| Sulfonylurea                                | 8.7       | 8.6       | <0.01 | 8.7       | 8.7        | <0.01 |
| Thiazolidinediones                          | 1.5       | 1.5       | <0.01 | 1.5       | 1.5        | <0.01 |
| DPP-4 inhibitors <sup>£</sup>               | 0.1       | 0.2       | 0.01  | 0.1       | 0.1        | <0.01 |
| SGLT2 inhibitors <sup>£</sup>               | 0.0       | 0.0       | -     | 0.0       | 0.0        | -     |
| Insulins                                    | 4.1       | 3.3       | 0.04  | 3.6       | 3.6        | <0.01 |
| <b>Other medications</b>                    |           |           |       |           |            |       |
| Proton pump inhibitors                      | 38.3      | 34.3      | 0.08  | 35.7      | 35.7       | <0.01 |
| Antidepressant agents                       | 33.3      | 36.9      | 0.07  | 35.6      | 35.7       | <0.01 |
| Anticholinergics agents                     | 3.7       | 2.7       | 0.05  | 3.0       | 3.0        | <0.01 |
| Benzodiazepine                              | 43.1      | 46.2      | 0.06  | 45.1      | 45.1       | <0.01 |
| Polypharmacy (≥10 medications)              | 52.7      | 49.1      | 0.07  | 50.4      | 50.4       | <0.01 |
| <b>Health care services in 1-year prior</b> |           |           |       |           |            |       |
| Number of visit medicals, mean (SD)         | 8.5 (9.9) | 7.6 (8.7) | 0.10  | 8.0 (8.7) | 8.0 (10.0) | <0.01 |
| Emergency visit, mean (SD)                  | 2.5 (3.1) | 2.2 (3.2) | 0.10  | 2.3 (2.9) | 2.3 (4.0)  | <0.01 |
| Hospitalization (%)                         | 63.8      | 57.7      | 0.12  | 59.8      | 59.8       | <0.01 |

\*: Mean ±SD (Standard Deviation)

†: CKD: Chronic renal failure with estimated Glomerular rate filtration < 30 mL/min.

‡: COPD: Chronic obstructive pulmonary disease

¥: ASA: Acid acetylic salicylic acid

£: DPP-4 inhibitors: Dipeptidyl peptidase; SGLT2 inhibitors: Sodium-glucose co-transporter 2 inhibitors.

**Table S4.** Frequency of use, olanzapine equivalent and users  $\geq 10$  mg in total cohort and sub-cohorts.

| <b>Atypical antipsychotics</b>       | <b>Profile of use at initiation in total cohort, N (%)</b>                              | <b>Equivalent olanzapine in total cohort Mean (SD)/Median at initiation and at 1 year (mg)</b> | <b>% <math>\geq 10</math> mg olanzapine equivalent at initiation and at 1 year in total cohort</b> |
|--------------------------------------|-----------------------------------------------------------------------------------------|------------------------------------------------------------------------------------------------|----------------------------------------------------------------------------------------------------|
| Aripiprazole                         | 98 (0.2%)                                                                               | Initiation:1.7 (1.3) / 1.3<br>1 year: 1.8 (1.3)/ 1.3                                           | Initiation:1.0%<br>1 year:0.0%                                                                     |
| Olanzapine                           | 4,076 (9.6%)                                                                            | Initiation:3.4 (1.8) / 2.5<br>1 year:3.4 (3.5) / 2.5                                           | Initiation:3.3%<br>1 year:4.3%                                                                     |
| Quetiapine                           | 9,089 (21.3%)                                                                           | Initiation:0.7 (0.4) / 0.6<br>1 year:1.3 (9.9) / 0.6                                           | Initiation:<0.1%<br>1 year:0.5%                                                                    |
| Risperidone                          | 14,127 (33.1%)                                                                          | Initiation:0.8 (1.0) / 0.5<br>1 year:1.1 (3.0) / 0.6                                           | Initiation:<0.1%<br>1 year:0.6%                                                                    |
| Other atypical antipsychotic agents* | 85 (< 0.2%)                                                                             | Initiation:1.1 (1.4) / 0.5<br>1 year:1.1 (1.1) / 0.6                                           | Initiation:1.2%<br>1 year:0.0%                                                                     |
| <b>Typical antipsychotic</b>         | 15,175 (35.6%)                                                                          | Initiation:10.3 (54.5) / 1.0<br>1 year: 39.1 (109.1) / 1.0                                     | Initiation: 5.1%<br>1 year: 21.4%                                                                  |
| Haloperidol                          | 3,529 (8.3%)                                                                            | Initiation:2.0 (5.3) / 0.6<br>1 year: 1.8 (8.2) / 0.6                                          | Initiation:0.4%<br>1 year:1.0%                                                                     |
| Prochlorperazine                     | 10,128 (23.7%)                                                                          | Initiation:0.9 (0.2) / 1.0<br>1 year: 4.8 (34.4) / 1.0                                         | Initiation:0.0%<br>1 year:2.5%                                                                     |
| Methotrimeprazine                    | 733 (1.7%)                                                                              | Initiation:188.7 (167.0)/74.6<br>1 year: 168.6 (177.2) / 74.6                                  | Initiation:100%<br>1 year:91.6%                                                                    |
| <b>Atypical antipsychotics</b>       | <b>Profile of use at initiation in sub-cohort without schizophrenia/dementia, N (%)</b> | <b>Equivalent olanzapine (mg) in sub-cohort Mean (SD)/Median at initiation and at 1 year</b>   | <b>% <math>\geq 10</math> mg olanzapine equivalent at initiation and at 1 year in sub-cohort</b>   |
| Aripiprazole                         | 74 (0.3%)                                                                               | Initiation:1.7 (1.4) / 1.3<br>1 year: 1.7 (1.4)/ 1.3                                           | Initiation:1.4%<br>1 year:0.0%                                                                     |
| Olanzapine                           | 2,365 (8.6%)                                                                            | Initiation:3.4 (1.8) / 2.5<br>1 year:3.4 (3.2) / 2.5                                           | Initiation:3.6%<br>1 year:4.5%                                                                     |
| Quetiapine                           | 5,552 (20.3%)                                                                           | Initiation:0.7 (0.5) / 0.6<br>1 year:1.4 (10.8) / 0.6                                          | Initiation:<0.1%<br>1 year:0.7%                                                                    |
| Risperidone                          | 6,125 (22.4%)                                                                           | Initiation:0.8 (1.1) / 0.5<br>1 year:1.1 (2.8) / 0.6                                           | Initiation:<0.1%<br>1 year:0.6%                                                                    |
| Other atypical antipsychotic agents* | 42 (< 0.2%)                                                                             | Initiation:1.1 (1.0) / 0.5<br>1 year:1.4 (1.5) / 0.8                                           | Initiation:0.0%<br>1 year:0.0%                                                                     |
| <b>Typical antipsychotic</b>         | 13,242 (48.3%)                                                                          | Initiation:10.2 (54.6) / 1.0<br>1 year: 49.7 (122.9) / 1.0                                     | Initiation: 5.0%<br>1 year: 26.1%                                                                  |
| Haloperidol                          | 2,290 (8.4%)                                                                            | Initiation:2.0 (4.5) / 0.6<br>1 year:1.7 (8.0) / 0.6                                           | Initiation:0.2%<br>1 year:0.4%                                                                     |
| Prochlorperazine                     | 9,607 (35.1%)                                                                           | Initiation:0.9 (0.2) / 1.0<br>1 year:5.2 (36.1) / 1.0                                          | Initiation:0.0%<br>1 year:2.5%                                                                     |
| Methotrimeprazine                    | 648 (2.4%)                                                                              | Initiation:185.4 (168.8)/74.6<br>1 year: 175.1 (180.6) / 74.6                                  | Initiation:100%<br>1 year:92.9%                                                                    |
| <b>Atypical antipsychotics</b>       | <b>Profile of use at initiation in sub-cohort of schizophrenia, N (%)</b>               | <b>Equivalent olanzapine in cohort of schizophrenia Mean (SD)/Median (mg)</b>                  | <b>% <math>\geq 10</math> mg olanzapine equivalent in cohort of schizophrenia</b>                  |
| Aripiprazole                         | 2 (0.3%)                                                                                | Initiation:2.3 (1.4) / 2.3<br>1 year: -                                                        | Initiation:0.0%<br>1 year:0.0%                                                                     |

|                                      |                                                                      |                                                                              |                                                             |
|--------------------------------------|----------------------------------------------------------------------|------------------------------------------------------------------------------|-------------------------------------------------------------|
| Olanzapine                           | 177 (22.4%)                                                          | Initiation:4.6 (2.6) / 5.0<br>1 year:5.1 (8.9) / 2.5                         | Initiation:11.3%<br>1 year:12.6%                            |
| Quetiapine                           | 148 (18.7%)                                                          | Initiation:1.0 (1.1) / 1.6<br>1 year:2.0 (2.1) / 0.6                         | Initiation:0.0%<br>1 year:1.1%                              |
| Risperidone                          | 364 (46.0%)                                                          | Initiation:1.2 (1.1) / 1.0<br>1 year:2.6 (6.0) / 1.0                         | Initiation:0.0%<br>1 year:3.7%                              |
| Other atypical antipsychotic agents* | 7 (0.9%)                                                             | ND                                                                           | ND                                                          |
| <b>Typical antipsychotics</b>        | 93 (11.8%)                                                           | Initiation: 33.9 (86.7) / 1.3<br>1 year: 25.3 (63.2) / 2.0                   | Initiation: 24.7%<br>1 year: 26.8%                          |
| Haloperidol                          | 48 (6.1%)                                                            | Initiation:8.1 (22.9) / 1.3<br>1 year:9.9 (28.8) / 1.1                       | Initiation:10.4%<br>1 year:9.1%                             |
| Prochlorperazine                     | 17 (2.1%)                                                            | Initiation:1.0 (0.1) / 1.0<br>1 year:10.0 (n=1)                              | Initiation:0.0%<br>1 year:100.0% (n=1)                      |
| Methotrimeprazine                    | 7 (1.9%)                                                             | Initiation: 287.8 (145.7)/ 373.1<br>1 year: 99.7 (138.8) / 74.6              | Initiation:100%<br>1 year:66.7%                             |
| <b>Atypical antipsychotics</b>       | <b>Profile of use at initiation in sub-cohort of dementia, N (%)</b> | <b>Equivalent olanzapine in cohort of dementia<br/>Mean (SD)/Median (mg)</b> | <b>% ≥10 mg olanzapine equivalent in cohort of dementia</b> |
| Aripiprazole                         | 22 (0.2%)                                                            | Initiation:1.8 (1.2) / 1.3<br>1 year: 1.9 (1.3)/ 1.3                         | Initiation:0.0%<br>1 year:0.0%                              |
| Olanzapine                           | 1,598 (10.8%)                                                        | Initiation:3.4 (1.6) / 2.5<br>1 year:3.2 (3.8) / 2.5                         | Initiation:2.2%<br>1 year:3.2%                              |
| Quetiapine                           | 3,441 (23.3%)                                                        | Initiation:0.7 (0.4) / 0.6<br>1 year:1.1 (8.8) / 0.6                         | Initiation:0.0%<br>1 year:0.2%                              |
| Risperidone                          | 7,797 (52.8%)                                                        | Initiation:0.8 (1.0) / 0.5<br>1 year:1.1 (2.9) / 0.5                         | Initiation:<0.1%<br>1 year:0.4%                             |
| Other atypical antipsychotic agents  | 39 (0.3%)                                                            | Initiation:0.7 (0.4) / 0.5<br>1 year:0.8 (0.5) / 0.6                         | Initiation:<0.1%<br>1 year:0.0%                             |
| <b>Typical antipsychotic</b>         | 1,868 (12.7%)                                                        | Initiation:10.4 (51.7) / 1.0<br>1 year: 7.7 (37.6) / 0.6                     | Initiation: 4.8%<br>1 year: 6.1%                            |
| Haloperidol                          | 1,211 (8.2%)                                                         | Initiation:1.9 (6.1) / 0.5<br>1 year:1.6 (7.7) / 0.6                         | Initiation:0.5%<br>1 year:1.1%                              |
| Prochlorperazine                     | 506 (3.4%)                                                           | Initiation:0.9 (0.2) / 1.0<br>1 year:1.0 (1.0) / 0.6                         | Initiation:0.0%<br>1 year:0.0%                              |
| Methotrimeprazine                    | 78 (0.5%)                                                            | Initiation: 207.4 (150.6)/ 74.6<br>1 year: 101.2 (117.5) / 74.6              | Initiation:100%<br>1 year:81.0%                             |

\*Other atypical antipsychotic agents: clozapine, loxapine, lurasidone and ziprasidone.



**Table S5.** Proportion of the level of adherence in the 5-year period of follow-up in the total cohort

| cat_adhesion_antipsych_5yrs_fup | Frequency | Percent | Cumulative Frequency | Cumulative Percent |
|---------------------------------|-----------|---------|----------------------|--------------------|
| 1) ADHÉSION < 50%               | 21509     | 50.43   | 21509                | 50.43              |
| 2) ADHÉSION 50%-59%             | 1710      | 4.01    | 23219                | 54.44              |
| 3) ADHÉSION 60%-69%             | 1834      | 4.30    | 25053                | 58.74              |
| 4) ADHÉSION 70%-79%             | 2056      | 4.82    | 27109                | 63.56              |
| 5) ADHÉSION 80%-89%             | 2981      | 6.99    | 30090                | 70.55              |
| 6) ADHÉSION 90%-99%             | 6576      | 15.42   | 36666                | 85.97              |
| 7) ADHÉSION 100%                | 5984      | 14.03   | 42650                | 100.00             |

**Table S6.** Hazard ratios (95% CI) for CVD/CEV and mortality risks according to the adherence  $\geq 60\%$  vs  $< 60\%$  (reference) after IPTW matching in the total cohort and sub-cohorts for all antipsychotic users.

| <b>Total cohort</b>                              | Incident rates in the 5-year period, per 100 person-years (95% CI) after IPTW matching |                        | Hazard ratios (95% CI) (ref.: $< 60\%$ ) | p-value   |
|--------------------------------------------------|----------------------------------------------------------------------------------------|------------------------|------------------------------------------|-----------|
|                                                  | $< 60\%$ (n=23,219)                                                                    | $\geq 60\%$ (n=19,431) |                                          |           |
| CVD/CEV events                                   |                                                                                        |                        |                                          |           |
| CAD                                              | 9.6 (9.4-9.9)                                                                          | 8.6 (8.3-8.8)          | 0.89 (0.86-0.93)                         | $<0.0001$ |
| Stroke                                           | 4.9 (4.7-5.1)                                                                          | 4.6 (4.4-4.8)          | 0.95 (0.90-0.99)                         | 0.0383    |
| MI                                               | 1.7 (1.6-1.8)                                                                          | 1.6 (1.5-1.7)          | 0.96 (0.88-1.05)                         | 0.3317    |
| All CVD/CEV                                      | 14.4 (14.1-14.8)                                                                       | 13.3 (12.9-13.6)       | 0.92 (0.89-0.96)                         | $<0.0001$ |
| All-cause mortality                              | 22.1 (21.8-22.5)                                                                       | 21.0 (20.6-21.4)       | 0.96 (0.94-0.98)                         | 0.0005    |
| <b>Sub-cohort without schizophrenia/dementia</b> | Incident rates in the 5-year period, per 100 person-years (95% CI) after IPTW matching |                        | Hazard ratios (95% CI) (ref.: $< 60\%$ ) | p-value   |
|                                                  | $< 60\%$ (n=18,002)                                                                    | $\geq 60\%$ (n=9,398)  |                                          |           |
| CVD/CEV events                                   |                                                                                        |                        |                                          |           |
| CAD                                              | 10.4 (10.1-10.7)                                                                       | 9.4 (9.1-9.8)          | 0.90 (0.86-0.95)                         | $<0.0001$ |
| Stroke                                           | 4.5 (4.3-4.7)                                                                          | 4.3 (4.1-4.6)          | 0.96 (0.89-1.03)                         | 0.2302    |
| MI                                               | 1.8 (1.6-1.9)                                                                          | 1.7 (1.5-1.8)          | 0.96 (0.86-1.08)                         | 0.5147    |
| All CVD/CEV                                      | 14.7 (14.3-15.0)                                                                       | 13.8 (13.3-14.3)       | 0.94 (0.90-0.99)                         | 0.0086    |
| All-cause mortality                              | 21.1 (20.7-21.5)                                                                       | 20.1 (19.6-20.7)       | 0.98 (0.94-1.01)                         | 0.1272    |
| <b>Sub-cohort of patients with schizophrenia</b> | Incident rates in the 5-year period, per 100 person-years (95% CI) after IPTW matching |                        | Hazard ratios (95% CI) (ref.: $< 60\%$ ) | p-value   |
|                                                  | $< 60\%$ (n=278)                                                                       | $\geq 60\%$ (n=513)    |                                          |           |
| CVD/CEV events                                   |                                                                                        |                        |                                          |           |
| CAD                                              | 5.8 (4.3-7.4)                                                                          | 7.4 (6.1-8.7)          | 1.27 (0.93-1.74)                         | 0.1320    |
| Stroke                                           | 3.7 (2.5-4.9)                                                                          | 4.7 (3.7-5.7)          | 1.28 (0.87-1.88)                         | 0.2085    |
| MI                                               | 1.1 (0.4-1.7)                                                                          | 1.5 (0.9-2.0)          | 1.39 (0.70-2.77)                         | 0.3487    |
| All CVD/CEV                                      | 8.8 (6.9-10.7)                                                                         | 12.1 (10.4-13.8)       | 1.37 (1.06-1.77)                         | 0.0165    |
| All-cause mortality                              | 11.5 (9.5-13.6)                                                                        | 10.6 (9.2-12.1)        | 0.92 (0.74-1.15)                         | 0.4698    |
| <b>Sub-cohort of patients with dementia</b>      | Incident rates in the 5-year period, per 100 person-years (95% CI) after IPTW matching |                        | Hazard ratios (95% CI) (ref.: $< 60\%$ ) | p-value   |
|                                                  | $< 60\%$ (n=9,750)                                                                     | $\geq 60\%$ (n=5,035)  |                                          |           |
| CVD/CEV events                                   |                                                                                        |                        |                                          |           |
| CAD                                              | 8.1 (7.6-8.6)                                                                          | 7.2 (6.9-7.5)          | 0.89 (0.83-0.96)                         | 0.0022    |
| Stroke                                           | 5.5 (5.1-5.9)                                                                          | 4.9 (4.6-5.1)          | 0.88 (0.81-0.96)                         | 0.0059    |
| MI                                               | 1.6 (1.4-1.8)                                                                          | 1.5 (1.3-1.6)          | 0.91 (0.78-1.07)                         | 0.2422    |
| All CVD/CEV                                      | 13.9 (13.3-14.6)                                                                       | 12.3 (11.8-12.7)       | 0.89 (0.83-0.94)                         | $<0.001$  |
| All-cause mortality                              | 23.4 (22.6-24.2)                                                                       | 22.9 (22.3-23.4)       | 0.98 (0.94-1.02)                         | 0.3141    |

CVD/CEV: Cardiovascular and cerebrovascular diseases; CAD: Coronary artery excluding MI; MI: Myocardial infarction

**Table S7.** Hazard ratios (95% CI) for CDV/CEV and mortality risks according to the adherence  $\geq 60\%$  vs  $< 60\%$  (reference) after IPTW matching in the total cohort and sub-cohorts for atypical antipsychotic users.

| <b>Total cohort</b>                              | Incident rates in the 5-year period, per 100 person-years (95% CI) after IPTW matching |                        | Hazard ratios (95% CI) (ref.: $< 60\%$ ) | p-value   |
|--------------------------------------------------|----------------------------------------------------------------------------------------|------------------------|------------------------------------------|-----------|
|                                                  | $< 60\%$ (n=23,219)                                                                    | $\geq 60\%$ (n=19,431) |                                          |           |
| CVD/CEV events                                   |                                                                                        |                        |                                          |           |
| CAD                                              | 9.6 (9.4-9.9)                                                                          | 8.5 (8.2-8.7)          | 0.88 (0.85-0.92)                         | $<0.0001$ |
| Stroke                                           | 4.9 (4.7-5.0)                                                                          | 4.6 (4.4-4.8)          | 0.95 (0.90-1.01)                         | 0.0803    |
| MI                                               | 1.7 (1.6-1.8)                                                                          | 1.6 (1.5-1.7)          | 0.97 (0.89-1.06)                         | 0.4641    |
| All CVD/CEV                                      | 14.4 (14.1-14.7)                                                                       | 13.2 (12.9-13.6)       | 0.93 (0.90-0.96)                         | $<0.0001$ |
| All-cause mortality                              | 24.5 (24.2-24.9)                                                                       | 17.6 (17.3-18.0)       | 0.74 (0.72-0.75)                         | $<0.0001$ |
| <b>Sub-cohort without schizophrenia/dementia</b> | Incident rates in the 5-year period, per 100 person-years (95% CI) after IPTW matching |                        | Hazard ratios (95% CI) (ref.: $< 60\%$ ) | p-value   |
|                                                  | $< 60\%$ (n=18,002)                                                                    | $\geq 60\%$ (n=9,398)  |                                          |           |
| CVD/CEV events                                   |                                                                                        |                        |                                          |           |
| CAD                                              | 10.4 (10.1-10.7)                                                                       | 9.4 (9.0-9.9)          | 0.91 (0.86-0.96)                         | 0.0002    |
| Stroke                                           | 4.5 (4.3-4.7)                                                                          | 4.5 (4.2-4.7)          | 0.99 (0.92-1.06)                         | 0.7472    |
| MI                                               | 1.7 (1.6-1.8)                                                                          | 1.7 (1.6-1.9)          | 1.01 (0.90-1.13)                         | 0.8777    |
| All CVD/CEV                                      | 14.6 (14.2-14.9)                                                                       | 14.0 (13.5-14.5)       | 0.97 (0.92-1.01)                         | 0.1239    |
| All-cause mortality                              | 23.4 (23.0-23.8)                                                                       | 15.0 (14.5-15.5)       | 0.67 (0.65-0.70)                         | $<0.0001$ |
| <b>Sub-cohort of patients with schizophrenia</b> | Incident rates in the 5-year period, per 100 person-years (95% CI) after IPTW matching |                        | Hazard ratios (95% CI) (ref.: $< 60\%$ ) | p-value   |
|                                                  | $< 60\%$ (n=278)                                                                       | $\geq 60\%$ (n=513)    |                                          |           |
| CVD/CEV events                                   |                                                                                        |                        |                                          |           |
| CAD                                              | 6.1 (4.6-7.5)                                                                          | 7.4 (6.1-8.7)          | 1.22 (0.90-1.64)                         | 0.2008    |
| Stroke                                           | 3.6 (2.5-4.7)                                                                          | 4.8 (3.8-5.9)          | 1.34 (0.92-1.95)                         | 0.1237    |
| MI                                               | 1.2 (0.6-1.8)                                                                          | 1.4 (0.9-1.9)          | 1.18 (0.62-2.25)                         | 0.6252    |
| All CVD/CEV                                      | 9.1 (7.3-10.9)                                                                         | 12.1 (10.4-13.8)       | 1.33 (1.04-1.70)                         | 0.0233    |
| All-cause mortality                              | 11.8 (9.9-13.8)                                                                        | 10.4 (8.9-11.8)        | 0.88 (0.71-1.09)                         | 0.2320    |
| <b>Sub-cohort of patients with dementia</b>      | Incident rates in the 5-year period, per 100 person-years (95% CI) after IPTW matching |                        | Hazard ratios (95% CI) (ref.: $< 60\%$ ) | p-value   |
|                                                  | $< 60\%$ (n=9,750)                                                                     | $\geq 60\%$ (n=5,035)  |                                          |           |
| CVD/CEV events                                   |                                                                                        |                        |                                          |           |
| CAD                                              | 8.3 (7.8-8.8)                                                                          | 7.1 (6.8-7.4)          | 0.86 (0.80-0.92)                         | $<0.0001$ |
| Stroke                                           | 5.5 (5.1-5.9)                                                                          | 4.8 (4.6-5.1)          | 0.88 (0.81-0.97)                         | 0.0062    |
| MI                                               | 1.7 (1.5-1.9)                                                                          | 1.5 (1.3-1.6)          | 0.86 (0.74-1.01)                         | 0.0651    |
| All CVD/CEV                                      | 14.1 (13.4-14.7)                                                                       | 12.1 (11.7-12.6)       | 0.87 (0.82-0.92)                         | $<0.001$  |
| All-cause mortality                              | 25.0 (24.3-25.8)                                                                       | 21.9 (21.4-22.5)       | 0.88 (0.84-0.91)                         | $<0.0001$ |

CVD/CEV: Cardiovascular and cerebrovascular diseases; CAD: Coronary artery excluding MI; MI: Myocardial infarction

**Table S8.** Hazard ratios (95% CI) for CVD/CEV and mortality risks according to the adherence  $\geq 60\%$  vs  $< 60\%$  (reference) after IPTW matching in the total cohort and sub-cohorts for typical antipsychotic users.

| <b>Total cohort</b>                              |  | Incident rates in the 5-year period, per 100 person-years (95% CI) after IPTW matching |                           | Hazard ratios (95% CI) (ref.: $< 60\%$ ) | p-value   |
|--------------------------------------------------|--|----------------------------------------------------------------------------------------|---------------------------|------------------------------------------|-----------|
|                                                  |  | $< 60\%$<br>(n=23,219)                                                                 | $\geq 60\%$<br>(n=19,431) |                                          |           |
| CVD/CEV events                                   |  |                                                                                        |                           |                                          |           |
| CAD                                              |  | 9.1 (8.9-9.3)                                                                          | 9.7 (8.8-10.8)            | 1.03 (0.91-1.15)                         | 0.6805    |
| Stroke                                           |  | 4.8 (4.6-4.9)                                                                          | 4.4 (3.7-5.2)             | 0.88 (0.74-1.04)                         | 0.1405    |
| MI                                               |  | 1.7 (1.6-1.7)                                                                          | 1.7 (1.2-2.1)             | 0.94 (0.72-1.23)                         | 0.6512    |
| All CVD/CEV                                      |  | 13.9 (13.7-14.1)                                                                       | 14.0 (12.7-15.4)          | 0.96 (0.87-1.06)                         | 0.3680    |
| All cause mortality                              |  | 20.2 (19.9-20.4)                                                                       | 76.2 (73.2-79.2)          | 3.35 (3.22-3.50)                         | $<0.0001$ |
| <b>Sub-cohort without schizophrenia/dementia</b> |  | Incident rates in the 5-year period, per 100 person-years (95% CI) after IPTW matching |                           | Hazard ratios (95% CI) (ref.: $< 60\%$ ) | p-value   |
|                                                  |  | $< 60\%$ (n=18,002)                                                                    | $\geq 60\%$ (n=9,398)     |                                          |           |
| CVD/CEV events                                   |  |                                                                                        |                           |                                          |           |
| CAD                                              |  | 10.1 (9.9-10.4)                                                                        | 9.2 (7.8-10.6)            | 0.89 (0.76-1.03)                         | 0.1129    |
| Stroke                                           |  | 4.5 (4.3-4.6)                                                                          | 3.2 (2.4-4.0)             | 0.68 (0.53-0.87)                         | 0.0020    |
| MI                                               |  | 1.7 (1.7-1.8)                                                                          | 1.3 (0.8-1.8)             | 0.71 (0.48-1.04)                         | 0.0758    |
| All CVD/CEV                                      |  | 14.4 (14.2-14.7)                                                                       | 12.0 (10.4-13.6)          | 0.79 (0.69-0.91)                         | 0.0007    |
| All-cause mortality                              |  | 19.1 (18.8-19.4)                                                                       | 82.0 (78.1-85.9)          | 3.58 (3.40-3.76)                         | $<0.0001$ |
| <b>Sub-cohort of patients with schizophrenia</b> |  | Incident rates in the 5-year period, per 100 person-years (95% CI) after IPTW matching |                           | Hazard ratios (95% CI) (ref.: $< 60\%$ ) | p-value   |
|                                                  |  | $< 60\%$ (n=278)                                                                       | $\geq 60\%$ (n=513)       |                                          |           |
| CVD/CEV events                                   |  |                                                                                        |                           |                                          |           |
| CAD                                              |  | 6.9 (5.9-7.9)                                                                          | 5.7 (1.4-10.1)            | 0.82 (0.38-1.78)                         | 0.6196    |
| Stroke                                           |  | 4.4 (3.6-5.2)                                                                          | 3.5 (0.2-6.8)             | 0.80 (0.31-2.07)                         | 0.6464    |
| MI                                               |  | 1.4 (0.9-1.8)                                                                          | 0.7 (0.0-2.2)             | 0.54 (0.07-4.14)                         | 0.5506    |
| All CVD/CEV                                      |  | 11.0 (9.7-12.3)                                                                        | 9.8 (4.0-15.6)            | 0.89 (0.49-1.62)                         | 0.7053    |
| All-cause mortality                              |  | 10.8 (9.6-12.0)                                                                        | 13.4 (7.1-19.8)           | 1.25 (0.77-2.02)                         | 0.3695    |
| <b>Sub-cohort of patients with dementia</b>      |  | Incident rates in the 5-year period, per 100 person-years (95% CI) after IPTW matching |                           | Hazard ratios (95% CI) (ref.: $< 60\%$ ) | p-value   |
|                                                  |  | $< 60\%$ (n=9,750)                                                                     | $\geq 60\%$ (n=5,035)     |                                          |           |
| CVD/CEV events                                   |  |                                                                                        |                           |                                          |           |
| CAD                                              |  | 7.4 (7.2-7.7)                                                                          | 11.3 (8.9-13.7)           | 1.45 (1.16-1.80)                         | 0.0009    |
| Stroke                                           |  | 5.1 (4.9-5.3)                                                                          | 5.1 (3.5-6.7)             | 0.95 (0.69-1.31)                         | 0.7593    |
| MI                                               |  | 1.5 (1.4-1.6)                                                                          | 2.7 (1.6-3.8)             | 1.66 (1.09-2.55)                         | 0.0195    |
| All CVD/CEV                                      |  | 12.7 (12.4-13.1)                                                                       | 17.0 (14.0-20.1)          | 1.25 (1.04-1.51)                         | 0.0153    |
| All-cause mortality                              |  | 22.4 (22.0-22.9)                                                                       | 55.5 (50.4-60.6)          | 2.45 (2.23-2.69)                         | $<0.0001$ |

CVD/CEV: Cardiovascular and cerebrovascular diseases; CAD: Coronary artery excluding MI; MI: Myocardial infarction

**Table S9.** Hazard ratios (95% CI) for CVD/CEV and mortality risks according to the adherence  $\geq 70\%$  vs  $< 70\%$  (reference) after IPTW matching according to the adherence level in the total cohort.

|                                           | CVD/CEV events   |           | Mortality        |         |
|-------------------------------------------|------------------|-----------|------------------|---------|
|                                           | HR 95% CI        | p-value   | HR 95% CI        | p-value |
| Total cohort                              |                  |           |                  |         |
| Adherence $\geq 70\%$ (ref.: $<70\%$ )    | 0.92 (0.89-0.95) | $<0.0001$ | 0.97 (0.95-0.99) | 0.0281  |
| Sub-cohort without schizophrenia/dementia |                  |           |                  |         |
| Adherence $\geq 70\%$ (ref.: $<70\%$ )    | 0.94 (0.90-0.98) | 0.0038    | 0.99 (0.96-1.03) | 0.6149  |
| Sub-cohort of patients with schizophrenia |                  |           |                  |         |
| Adherence $\geq 70\%$ (ref.: $<70\%$ )    | 1.45 (1.13-1.85) | 0.0033    | 1.01 (0.81-1.24) | 0.9903  |
| Sub-cohort of patients with dementia      |                  |           |                  |         |
| Adherence $\geq 70\%$ (ref.: $<70\%$ )    | 0.88 (0.83-0.94) | $<0.0001$ | 0.99 (0.95-1.03) | 0.4847  |

**Table S10. Description of data sources: RAMQ database**

The cohort is coming from the Med-Echo administrative databases and the “*Régie de l’Assurance Maladie du Québec*” (RAMQ). The Med-Echo administrative databases, which store data on hospital discharges, and RAMQ databases, which store data on medical services, and public drug plans, and all those databases are managed by the RAMQ.<sup>1-4</sup> The databases were linked using encrypted health insurance numbers. The information from these databases provide a comprehensive picture of the status of hospital admissions, medical services and public drug plans.

Data were collected from the RAMQ and Med-Echo databases, which administer public healthcare insurance programs in the province of Quebec, Canada. The Med-Echo database gathers information on acute care hospitalizations, such as date of admission, length of stay, primary and up to 15 secondary diagnoses. The RAMQ data were extracted from three databases. The beneficiary database lists age, gender, socioeconomic status, and date of death. The medical services file contains claims for all inpatient and ambulatory services and diagnostic codes are classified according to the International Classification of Diseases, 9<sup>th</sup> Revision (ICD-9). All surgical procedures codes follow the Canadian classification of diagnostic, therapeutic and surgical procedures.<sup>5</sup> The pharmaceutical database provides data on delivered medication in community pharmacies such as the date of filling, name of the drug, dose, quantity, dosage form, and duration of therapy. The RAMQ covers all Quebec residents for the cost of physician visits, hospitalizations and procedures, and 94% of Quebec citizens aged 65 and older for the drug plan.<sup>1,3</sup>

1. Tamblyn, R., Lavoie, G., Petrella, L. & Monette, J. The use of prescription claims databases in pharmacoepidemiological research: the accuracy and comprehensiveness of the prescription claims database in Quebec. *J. Clin. Epidemiol.* **48**, 999-1009 (1995).
2. Egualé, T., Winslade, N., Hanley, J.A., Buckeridge, D.L. & Tamblyn, R. Enhancing pharmacosurveillance with systematic collection of treatment indication in electronic prescribing: a validation study in Canada. *Drug Saf.* **33**, 559-567 (2010).
3. Wilchesky, M., Tamblyn, R.M. & Huang, A. Validation of diagnostic codes within medical services claims. *J. Clin. Epidemiol.* **57**, 131-141 (2004).
4. Tamblyn, R., Reid, T., Mayo, N., McLeod, P. & Churchill-Smith, M. Using medical services claims to assess injuries in the elderly: sensitivity of diagnostic and procedure codes for injury ascertainment. *J. Clin. Epidemiol.* **53**, 183-194 (2000).
5. Régie de l'assurance maladie du Québec. Rapport annuel de gestion 2005-2006. Quebec: Régie de l'assurance maladie du Québec (2006).

ICD-9 and ICD-10, International Classification of Diseases, 9<sup>th</sup> and 10<sup>th</sup> Revision; RAMQ, *Régie de l’Assurance Maladie du Québec*.

**Table S11.** Definition of cardiovascular risk factors or diseases according to ICD-9 and ICD-10 from Med-Echo databases or RAMQ medical service files.

| <b>Diagnosis</b>                                             | <b>ICD-9 codes</b>                                                                                                                                                                                                                                                   | <b>ICD-10 codes</b>                                                                                                                                                                                                    |
|--------------------------------------------------------------|----------------------------------------------------------------------------------------------------------------------------------------------------------------------------------------------------------------------------------------------------------------------|------------------------------------------------------------------------------------------------------------------------------------------------------------------------------------------------------------------------|
| <b>Hypertension</b>                                          | 401                                                                                                                                                                                                                                                                  | I10                                                                                                                                                                                                                    |
| <b>Diabetes</b>                                              | 250.x                                                                                                                                                                                                                                                                | E08, E10, E11, E13                                                                                                                                                                                                     |
| <b>Dyslipidemia</b>                                          | 272                                                                                                                                                                                                                                                                  | E78                                                                                                                                                                                                                    |
| <b>Coronary artery disease</b>                               | 410-414                                                                                                                                                                                                                                                              | I20-I25                                                                                                                                                                                                                |
| <b>Myocardial infarction</b>                                 | 410.xx                                                                                                                                                                                                                                                               | I21, I22, I23                                                                                                                                                                                                          |
| <b>Stroke</b>                                                |                                                                                                                                                                                                                                                                      |                                                                                                                                                                                                                        |
| <i>Hemorrhagic stroke intracranial (non-traumatic)</i>       | 430, 431, 432.x                                                                                                                                                                                                                                                      | I60, I61, I62                                                                                                                                                                                                          |
| <i>Ischaemic stroke</i>                                      | 433.xx, 434.xx, 436.0, 436.9                                                                                                                                                                                                                                         | I63 except I63.6, I64                                                                                                                                                                                                  |
| <i>Transient ischemic attack</i>                             | 435.x                                                                                                                                                                                                                                                                | G45                                                                                                                                                                                                                    |
| <b>Chronic heart failure</b>                                 | 428.0, 428.1, 428.9                                                                                                                                                                                                                                                  | I50, I50.1, I50.9                                                                                                                                                                                                      |
| <b>Atrial fibrillation</b>                                   | 427.3                                                                                                                                                                                                                                                                | I48                                                                                                                                                                                                                    |
| <b>Major bleeding</b>                                        |                                                                                                                                                                                                                                                                      |                                                                                                                                                                                                                        |
| <b>-Intracranial major bleeding</b>                          |                                                                                                                                                                                                                                                                      |                                                                                                                                                                                                                        |
| <i>Intracranial bleeding</i>                                 | 430, 431, 432.x, 852.x, 853.x                                                                                                                                                                                                                                        | I60, I61, I62, S06.3, S06.4, S06.5, S06.6                                                                                                                                                                              |
| <b>-Major gastrointestinal bleeding</b>                      |                                                                                                                                                                                                                                                                      |                                                                                                                                                                                                                        |
| <i>Upper gastrointestinal bleeding (only using Med-Echo)</i> | 456.1, 530.7, 531.0x, 531.2x, 531.4x, 531.6x, 532.0x, 532.2x, 532.4x, 532.6x, 533.0x, 533.2x, 533.4x, 533.6x, 534.0x, 534.2x, 534.4x, 534.6x, 535.1, 578.0                                                                                                           | I85.0, K22.6, K25.0, K25.2, K25.4, K25.6, K26.0, K26.2, K26.4, K26.6, K27.0, K27.2, K27.4, K27.6, K28.0, K28.2, K28.4, K28.6, K29.0, K92.0                                                                             |
| <i>Upper gastrointestinal bleeding (only using RAMQ)</i>     | 456.1, 530.7, 531.0x, 531.2x, 531.4x, 531.6x, 532.0x, 532.2x, 532.4x, 532.6x, 533.0x, 533.2x, 533.4x, 533.6x, 534.0x, 534.2x, 534.4x, 534.6x, 535.1, 578.0 RAMQ ICD-9 at an emergency room and procedure endoscopic control of gastric or duodenal bleeding or upper | I85.0, K22.6, K25.0, K25.2, K25.4, K25.6, K26.0, K26.2, K26.4, K26.6, K27.0, K27.2, K27.4, K27.6, K28.0, K28.2, K28.4, K28.6, K29.0, K92.0 RAMQ ICD-9 at an emergency room and procedure endoscopic control of gastric |

|                                                            |                                                                                                                                                                                                                                                        |                                                                                                                                                                                                         |
|------------------------------------------------------------|--------------------------------------------------------------------------------------------------------------------------------------------------------------------------------------------------------------------------------------------------------|---------------------------------------------------------------------------------------------------------------------------------------------------------------------------------------------------------|
|                                                            | gastrointestinal endoscopy including esophagus, stomach, and either the duodenum and/or jejunum as appropriate with control of bleeding, any method (code 00691) within 7 days                                                                         | or duodenal bleeding or upper gastrointestinal endoscopy including esophagus, stomach, and either the duodenum and/or jejunum as appropriate with control of bleeding, any method (00691) within 7 days |
| <i>Lower gastrointestinal bleeding</i>                     | 562.02, 562.03, 562.12, 562.13, 569.3x, 569.85, 578.1x, 578.9                                                                                                                                                                                          | K57.11, K57.13, K57.31, K57.33, K62.5, K55.21, K92.1, K92.2                                                                                                                                             |
| <b>-Other critical sites of major bleeding</b>             |                                                                                                                                                                                                                                                        |                                                                                                                                                                                                         |
| <i>Gross hematuria</i>                                     | 599.7                                                                                                                                                                                                                                                  | R31                                                                                                                                                                                                     |
| <i>Hemoptysis</i>                                          | 786.3x                                                                                                                                                                                                                                                 | R04.2, R04.89, R04.9                                                                                                                                                                                    |
| <i>Vitreous hemorrhage</i>                                 | 379.23                                                                                                                                                                                                                                                 | H43.13                                                                                                                                                                                                  |
| <i>Urogenital bleed</i>                                    | 626.2x and 280.0, 285.1 or 285.9                                                                                                                                                                                                                       | N92.0 and D50.0, D62, D64.9)                                                                                                                                                                            |
| <i>Hemarthrosis</i>                                        | 719.1x                                                                                                                                                                                                                                                 | M25.0x                                                                                                                                                                                                  |
| <i>Hemopericardium</i>                                     | 423.0                                                                                                                                                                                                                                                  | I31.2                                                                                                                                                                                                   |
| <i>Hemoperitoneum</i>                                      | 568.8                                                                                                                                                                                                                                                  | K66.1                                                                                                                                                                                                   |
| <i>Hemorrhage not specified</i>                            | 459.0x                                                                                                                                                                                                                                                 | R58.0                                                                                                                                                                                                   |
| <i>Acute posthemorrhagic anemia</i>                        | 285.1x                                                                                                                                                                                                                                                 | D62                                                                                                                                                                                                     |
| <b>-Systemic embolism</b>                                  | 444.x, 557.0, 362.31, 362.32, 598.31                                                                                                                                                                                                                   | I74                                                                                                                                                                                                     |
| <i>Arterial embolism and thrombosis</i>                    | 444.x                                                                                                                                                                                                                                                  | I74.0, I74.1, I74.2, I74.3, I74.5, I74.8, I74.9                                                                                                                                                         |
| <i>Ischemic colitis or mesenteric thromboembolism</i>      | 557.0                                                                                                                                                                                                                                                  | K55.0                                                                                                                                                                                                   |
| <i>Retinal artery thromboembolism</i>                      | 362.31, 362.32                                                                                                                                                                                                                                         | H34.1, H34.2                                                                                                                                                                                            |
| <i>Renal artery thromboembolism</i>                        | 593.81                                                                                                                                                                                                                                                 | N28.0                                                                                                                                                                                                   |
| <b>Peripheral arterial disease</b>                         | 440 (except 440.0), 441, 443.0, 443.89, 443.9                                                                                                                                                                                                          | I70.1 to I70.9, I71, I73.0, I73.89, I73.9                                                                                                                                                               |
| <b>Chronic kidney disease</b> (moderate to severe disease) | 404.01, 404.03, 404.11, 404.13, 404.91, 404.93, 580.0, 580.4, 581.0, 581.1, 581.2, 581.3, 581.89, 581.9, 582.0, 582.1, 582.2, 582.89, 582.9, 583.0, 583.1, 583.2, 583.4, 583.7, 583.6, 583.89, 583.9, 584.5, 584.6, 584.7, 584.8, 584.9, 585.1, 585.2, | I12, I13, N00, N01, N02, N03, N04, N05, N07, N11, N12, N14, N17, N18, N19                                                                                                                               |



|                      |                                                                                                                    |                                                                                                    |
|----------------------|--------------------------------------------------------------------------------------------------------------------|----------------------------------------------------------------------------------------------------|
|                      | 585.3, 585.4, 585.5, 585.6, 586, 590.0, 590.01, 590.80                                                             |                                                                                                    |
| <b>Schizophrenia</b> | 295.0-295.6, 295.8-295.9                                                                                           | F20                                                                                                |
| <b>Dementia</b>      | 46.1, 331.0, 331.1, 331.5, 290.x, 294.x and/or medication code (donepezil, rivastigmine, galantamine, memantine)). | G30, F00, F01, F02, F03 and/or medication code (donepezil, rivastigmine, galantamine, memantine)). |

ICD-9, International Classification of Diseases, 9<sup>th</sup> Revision; ICD-10, International Classification of Diseases, 10<sup>th</sup> Revision;

RAMQ : Régie de l'assurance maladie du Québec.

Med-Echo: Administrative databases of hospital discharge reports

.

**Table S12.** Olanzapine equivalents based Defined Daily Dose (DDD)

| Neuroleptics      | Conversion in olanzapine (mg) |
|-------------------|-------------------------------|
| Amisulpride       | dose/40 <sup>a</sup>          |
| Aripiprazole      | dose/1,5 <sup>a</sup>         |
| Chlorpromazine    | dose/30 <sup>a</sup>          |
| Clozapine         | dose/30 <sup>a</sup>          |
| Flupenthixol      | dose/0,6 <sup>a</sup>         |
| Fluphenazine      | dose <sup>a</sup>             |
| Haloperidol       | dose/0,8 <sup>a</sup>         |
| Loxapine          | dose/10 <sup>a</sup>          |
| Lurasidone        | dose/6 <sup>a</sup>           |
| Methotrimeprazine | dose/0,067 <sup>b</sup>       |
| Olanzapine        | dose <sup>a</sup>             |
| Paliperidone      | dose/0.6                      |
| Perphenazine      | dose/3 <sup>a</sup>           |
| Pimozide          | dose/0,4 <sup>a</sup>         |
| Prochlorperazine  | dose/10a                      |
| Quetiapine        | dose/40a                      |
| Risperidone       | dose/0,5a                     |
| Trifluoperazine   | dose/2a                       |
| Ziprasidone       | dose/8a                       |
| Zuclopenthixol    | dose/3a                       |

a : Stefan Leucht - Dose Equivalents for Antipsychotic Drugs: The DDD Method

b : David M. Gardner - International Consensus Study of Antipsychotic Dosing
